# Supplementary material for: Identification of loci of functional relevance to Barrett’s esophagus and esophageal adenocarcinoma: Cross-referencing of expression quantitative trait loci data from disease-relevant tissues with genetic association data
Source: PLoS One. 2019 Dec 31;14(12):e0227072. doi: 10.1371/journal.pone.0227072 (PMC6938334; doi:10.1371/journal.pone.0227072)
Supplement: S1 Table — (XLSX) [file pone.0227072.s001.xlsx]

## Sheet: S1
Status	Diagnosis	Gender	N (%)	mean age (SD)
Case	BE	m	732 (65.5%)	64.0 (11.5)
		f	385 (34.5%)	63.2 (12.6)
	EA	m	761 (86.9%)	67.0 (10.0)
		f	108 (12.3%)	68.4 (10.7)
Controls		m	507 (52.4%)	43.4 (10.9)
		f	460 (47.6%)	42.7 (10.9)
